# Supplementary material for: Determination of carbonate ion contents in layered double hydroxides by FTIR spectrometry
Source: Royal Society of Chemistry journal article supplement (doi:10.1039/c2ay25850a), 2012-01-01
Supplement: c2ay25850a.pdf [file c2ay25850a.pdf]

## Determination of Carbonate Ion Contents in Layered Double Hydroxides by FTIR Spectrometry

Toshiyuki Tanaka,<sup>a</sup> Yoshikazu Kameshima,<sup>b</sup> Shunsuke Nishimoto,<sup>b</sup> and Michihiro Miyake<sup>\*b</sup>

<sup>a</sup> Department of Material and Energy Science, Graduate School of Environmental Science, and

<sup>b</sup> Department of Material and Energy Science, Graduate School of Environmental and Life Science, Okayama University, 3-1-1 Tsushima-Naka, Kita-ku, Okayama 700-8530, Japan

\* Corresponding author. Tel.: +81 86 251 8906; fax: +81 86 251 8906.

E-mail address: mmiyake@cc.okayama-u.ac.jp (M. Miyake).

### Experimental Details

#### Materials

Special grade carboxylic acid and alcohol reagents were obtained from Kanto Chemical Co., Inc., and Nacalai Tesque, Inc., Japan, respectively, and were used as received without further purification. The starting material CO<sub>3</sub>-LDH is commercially available (DHT-6: Mg/Al = 3, Kyowa Kagaku Kogyo Co., Ltd.).

#### Sample characterization

Fourier transform infrared (FTIR) spectra were measured on a JASCO FT/IR-350 Fourier transform infrared spectrometer. Thermogravimetric-differential thermal analysis (TG-DTA) was performed using a Rigaku TG 8120 instrument over a temperature range from room temperature to 800°C with a 10°C min<sup>-1</sup> heating rate in air, using  $\alpha$ -Al<sub>2</sub>O<sub>3</sub> as a standard. The contents of metal elements and carboxylate ions of the LDH samples were analyzed using a Thermo Fisher Scientific iCAP 6300Duo inductively-coupled plasma (ICP) spectrometer and a Dionex DX-100 ion chromatograph by dissolving the samples in dilute H<sub>2</sub>SO<sub>4</sub>. CHN elemental analysis was carried out using a Perkin Elmer 2400 Series II CHNS/O analyzer.

## Determination of $\text{CO}_3^{2-}$ content by FTIR spectrometry or chemical composition analyses

### Deconvolution results of $\text{CO}_3\text{-LDH}$

**Table S1.** Separated peak area of the  $\nu_3\text{-CO}_3^{2-}$  band of the starting  $\text{CO}_3\text{-LDH}$  and calculated statistical values.

| Entry | $A_i$ <sup>a</sup> | $A_i - \bar{A}$ <sup>b</sup> | $(A_i - \bar{A})^2$ |
|-------|--------------------|------------------------------|---------------------|
| 1     | 70.316             | -11.548                      | 133.367             |
| 2     | 72.800             | -9.064                       | 82.164              |
| 3     | 79.964             | -1.900                       | 3.612               |
| 4     | 88.145             | 6.281                        | 39.445              |
| 5     | 102.030            | 20.166                       | 406.649             |
| 6     | 72.877             | -8.987                       | 80.774              |
| 7     | 72.647             | -9.217                       | 84.961              |
| 8     | 82.722             | 0.858                        | 0.735               |
| 9     | 85.526             | 3.662                        | 13.407              |
| 10    | 86.058             | 4.194                        | 17.586              |
| 11    | 87.424             | 5.560                        | 30.909              |

<sup>a</sup>  $A_i$ : Peak area of  $\nu_3(\text{CO}_3^{2-})$  band of  $\text{CO}_3\text{-LDH}$ . <sup>b</sup>  $\bar{A}$ : Mean value of  $A_i$ .

### Chemical composition analyses of $\text{RCOO-LDHs}$

**Table S2.** Compositions of the  $\text{RCOO-LDHs}$  with different  $\text{CO}_3^{2-}$  contents and molar ratios of  $2(\text{CO}_3^{2-})/\text{Al}$ .

| $\text{RCOO-LDH}$               | Composition <sup>d</sup>                                                                                                                       | $2(\text{CO}_3^{2-})/\text{Al}$ |
|---------------------------------|------------------------------------------------------------------------------------------------------------------------------------------------|---------------------------------|
| Formate-LDH (1) <sup>a</sup>    | $[\text{Mg}_{0.747}\text{Al}_{0.253}(\text{OH})_2](\text{HCOO})_{0.106}(\text{CO}_3)_{0.074} \cdot 0.146\text{H}_2\text{O}$                    | 0.5827                          |
| Formate-LDH (2) <sup>a</sup>    | $[\text{Mg}_{0.747}\text{Al}_{0.253}(\text{OH})_2](\text{HCOO})_{0.164}(\text{CO}_3)_{0.044} \cdot 0.150\text{H}_2\text{O}$                    | 0.3512                          |
| Formate-LDH (3) <sup>a</sup>    | $[\text{Mg}_{0.742}\text{Al}_{0.258}(\text{OH})_2](\text{HCOO})_{0.189}(\text{CO}_3)_{0.034} \cdot 0.130\text{H}_2\text{O}$                    | 0.2680                          |
| Acetate-LDH (1) <sup>b</sup>    | $[\text{Mg}_{0.742}\text{Al}_{0.258}(\text{OH})_2](\text{CH}_3\text{COO})_{0.102}(\text{CO}_3)_{0.078} \cdot 0.224\text{H}_2\text{O}$          | 0.6059                          |
| Acetate-LDH (2) <sup>b</sup>    | $[\text{Mg}_{0.735}\text{Al}_{0.265}(\text{OH})_2](\text{CH}_3\text{COO})_{0.145}(\text{CO}_3)_{0.060} \cdot 0.195\text{H}_2\text{O}$          | 0.4522                          |
| Acetate-LDH (3) <sup>b</sup>    | $[\text{Mg}_{0.738}\text{Al}_{0.262}(\text{OH})_2](\text{CH}_3\text{COO})_{0.193}(\text{CO}_3)_{0.034} \cdot 0.161\text{H}_2\text{O}$          | 0.2616                          |
| Acetate-LDH (4) <sup>b</sup>    | $[\text{Mg}_{0.727}\text{Al}_{0.273}(\text{OH})_2](\text{CH}_3\text{COO})_{0.207}(\text{CO}_3)_{0.033} \cdot 0.216\text{H}_2\text{O}$          | 0.2409                          |
| Acetate-LDH (5) <sup>b</sup>    | $[\text{Mg}_{0.731}\text{Al}_{0.269}(\text{OH})_2](\text{CH}_3\text{COO})_{0.240}(\text{CO}_3)_{0.015} \cdot 0.272\text{H}_2\text{O}$          | 0.1087                          |
| Acetate-LDH (6) <sup>b</sup>    | $[\text{Mg}_{0.767}\text{Al}_{0.233}(\text{OH})_2](\text{CH}_3\text{COO})_{0.227}(\text{CO}_3)_{0.003} \cdot 0.696\text{H}_2\text{O}$          | 0.0254                          |
| Propionate-LDH (1) <sup>c</sup> | $[\text{Mg}_{0.761}\text{Al}_{0.239}(\text{OH})_2](\text{C}_2\text{H}_5\text{COO})_{0.035}(\text{CO}_3)_{0.102} \cdot 0.200\text{H}_2\text{O}$ | 0.8543                          |
| Propionate-LDH (2) <sup>c</sup> | $[\text{Mg}_{0.765}\text{Al}_{0.235}(\text{OH})_2](\text{C}_2\text{H}_5\text{COO})_{0.064}(\text{CO}_3)_{0.086} \cdot 0.225\text{H}_2\text{O}$ | 0.7271                          |
| Propionate-LDH (3) <sup>c</sup> | $[\text{Mg}_{0.763}\text{Al}_{0.237}(\text{OH})_2](\text{C}_2\text{H}_5\text{COO})_{0.080}(\text{CO}_3)_{0.079} \cdot 0.275\text{H}_2\text{O}$ | 0.6609                          |
| Propionate-LDH (4) <sup>c</sup> | $[\text{Mg}_{0.732}\text{Al}_{0.268}(\text{OH})_2](\text{C}_2\text{H}_5\text{COO})_{0.178}(\text{CO}_3)_{0.046} \cdot 0.479\text{H}_2\text{O}$ | 0.3375                          |

<sup>a</sup> The samples prepared by formic acid/1-propanol (30°C, 4 h) in different concentrations. <sup>b</sup> The samples prepared by acetic acid/ethanol (50°C, 24 h) in different concentrations. <sup>c</sup> The samples prepared by propionic acid/methanol (70°C, 24 h) in different concentrations. <sup>d</sup> Chemical compositions were obtained from elemental analyses using ICP, CHN analysis, ion chromatography, and TG-DTA.
